1 **Title: Combination therapy with nirmatrelvir and molnupiravir improves the survival of**  
2 **SARS-CoV-2 infected mice**

3 **Running title: Improved survival with nirmatrelvir and molnupiravir**

4 Ju Hwan Jeong<sup>1,†</sup>, Santosh Chokkakula<sup>1,†</sup>, Seong Cheol Min<sup>1</sup>, Beom Kyu Kim<sup>1</sup>, Won-Suk  
5 Choi<sup>1</sup>, Sol Oh<sup>1</sup>, Yu Soo Yun<sup>1</sup>, Da Hyeon Kang<sup>1</sup>, Ok-Jun Lee<sup>2</sup>, Eung-Gook Kim<sup>3</sup>, Jang-Hoon  
6 Choi<sup>4</sup>, Joo-Yeon Lee<sup>5</sup>, Young Ki Choi<sup>1,6</sup>, Yun Hee Baek<sup>1</sup>, Min-Suk Song<sup>1,\*</sup>

7 <sup>1</sup>Department of Microbiology, Chungbuk National University College of Medicine and  
8 Medical Research Institute, Cheongju, Chungbuk, 28644, Republic of Korea.

9 <sup>2</sup>Departments of Pathology, Chungbuk National University Hospital, Cheongju, Republic of  
10 Korea.

11 <sup>3</sup>Department of Biochemistry, Chungbuk National University College of Medicine and Medical  
12 Research Institute, Cheongju, Chungbuk, 28644, Republic of Korea.

13 <sup>4</sup>Division of Acute Viral Disease, Center for Emerging Virus Research, National Institute of  
14 Infectious Diseases, Korea National Institute of Health, Cheongju 28159, Republic of Korea

15 <sup>5</sup>Center for Emerging Virus Research, Korea National Institute of Health, Korea Disease  
16 Control and Prevention Agency, Cheongju-si, Republic of Korea

17 <sup>6</sup>Center for Study of Emerging and Re-emerging Viruses, Korea Virus Research Institute,  
18 Institute for Basic Science (IBS), Daejeon, 34126, Republic of Korea.

19 † These authors contributed equally to this work

20 \* Corresponding author:

21 Min-Suk Song

22 College of Medicine and Medical Research Institute,

23 Chungbuk National University, Chungdae-ro 1,

24 Seowon-Ku, Cheongju, 28644, Republic of Korea

25 Tel : 82-43-261-3778

26 E-mail : [songminsuk@chungbuk.ac.kr](mailto:songminsuk@chungbuk.ac.kr)

27 **Combination therapy with nirmatrelvir and molnupiravir improves the survival of**  
28 **SARS-CoV-2 infected mice**

29 **ABSTRACT**

30 As the SARS-CoV-2 pandemic remains uncontrolled owing to the continuous emergence of  
31 variants of concern, there is an immediate need to implement the most effective antiviral  
32 treatment strategies, especially for risk groups. Here, we evaluated the therapeutic potency of  
33 nirmatrelvir, remdesivir, and molnupiravir and their combinations in SARS-CoV-2-infected  
34 K18-hACE2 transgenic mice. Systemic treatment of mice with each drug (20 mg/kg) resulted  
35 in slightly enhanced antiviral efficacy and yielded an increased life expectancy of only about  
36 20–40% survival. However, combination therapy with nirmatrelvir (20 mg/kg) and  
37 molnupiravir (20 mg/kg) in lethally infected mice showed profound inhibition of SARS-CoV-  
38 2 replication in both the lung and brain and synergistically improved survival times up to 80%  
39 compared to those with nirmatrelvir (P= 0.0001) and molnupiravir (P= 0.0001) administered  
40 alone. This combination therapy effectively reduced clinical severity score, virus-induced  
41 tissue damage, and viral distribution compared to those in animals treated with these  
42 monotherapies. Furthermore, all these assessments associated with this combination were also  
43 significantly higher than that of mice receiving remdesivir monotherapy (P= 0.0001) and the  
44 nirmatrelvir (20 mg/kg) and remdesivir (20 mg/kg) combination (P= 0.0001), underscored the  
45 clinical significance of this combination. By contrast, the nirmatrelvir and remdesivir  
46 combination showed less antiviral efficacy, with lower survival compared to nirmatrelvir  
47 monotherapy, demonstrating the inefficient therapeutic effect of this combination. The  
48 combination therapy with nirmatrelvir and molnupiravir contributes to alleviated morbidity

49 and mortality, which can serve as a basis for the design of clinical studies of this combination  
50 in the treatment of COVID-19 patients.

## 51 **IMPORTANCE**

52 Since SARS-CoV-2 spread rapidly with the emergence of new variants of concerns, it is  
53 necessary to develop effective treatment strategies to treat elderly individuals and those with  
54 comorbidities. Antiviral therapy using a combination of drugs is more effective in eradicating  
55 viruses and will undoubtedly improve the clinical outcome and survival probability of  
56 hospitalized SARS-CoV-2 patients. In the current study, we observed three FDA-approved  
57 antivirals nirmatrelvir, remdesivir, and molnupiravir have therapeutic significance with  
58 moderate survival for their monotherapies against SARS-CoV-2 infected K18-hACE2 mouse  
59 model. The combination of nirmatrelvir and molnupiravir showed significant antiviral activity  
60 and a higher survival rate of approximately 80%, providing *in vivo* evidence of the potential  
61 utility of this combination. In contrast, nirmatrelvir and remdesivir combination showed less  
62 antiviral potency and emphasized the ineffective significance with less survival. The current  
63 study suggests that the nirmatrelvir and molnupiravir combination is an effective drug regimen  
64 strategy in treating SARS-CoV-2 patients.

## 65 **KEYWORDS**

66 SARS-CoV-2, COVID-19, Antiviral, Nirmatrelvir, Remdesivir, Molnupiravir, Monotherapy,  
67 Combination therapy

68

## 69 INTRODUCTION

70 Since severe acute respiratory syndrome coronavirus-2 (SARS-CoV-2) was first identified in  
71 China in December 2019, the virus has spread rapidly worldwide, causing 538,321,874  
72 confirmed cases, including 6,320,599 deaths (1). It poses a severe threat to health care systems  
73 and economies and is devastating to some populations, such as elderly individuals and those  
74 with comorbidities. We can also expect to coexist with the virus for a long time. Fortunately,  
75 well-established technology platforms and unprecedented efforts have led to the development  
76 of an effective vaccine as fast as the disease spread, saving the lives of millions and billions of  
77 people. The vaccine is also effective for multiple variants, such as alpha, beta, gamma, delta,  
78 and omicron, that have emerged thus far (2).

79 Despite the availability of vaccines, it is imperative to develop effective drugs that have broad-  
80 spectrum effects on current and future potential coronavirus infections, which could provide a  
81 way to ease disease symptoms and prevent death. Several direct-acting antiviral agents have  
82 been approved by regulatory agencies and are advancing in various stages of clinical  
83 development. These antivirals target different viral proteins and are categorized into three  
84 classes. Monoclonal antibodies (mAbs) are prescribed as drugs that target the spike protein,  
85 and direct-acting small molecules interfere with the viral replication machinery. Usually, mAbs  
86 target only the spike protein, the timeline for approval of a novel antibody for viral infection  
87 management is prolonged, and side effects such as antibody-dependent enhancement of viral  
88 infections are also considered. Moreover, most of the approved mAbs are not sufficiently  
89 effective against SARS-CoV-2 variants (3, 4). Direct-acting small molecules can be divided  
90 into two classes: those targeting RNA-dependent RNA polymerase (RdRp) and those targeting

91 viral proteases, such as the main protease ( $M^{pro}$ , also known as  $3CL^{pro}$ ) and papain-like protease  
92 ( $PL^{pro}$ ). Remdesivir (RDV) is the prodrug of the nucleoside analog GS-441524, the first  
93 approved drug that targets RdRp (5, 6). Molnupiravir (MK-4482 or EIDD-2801), a prodrug of  
94 EIDD-1931 ( $\beta$ -D-N4-deoxycytidine), also targets RdRp and exhibits improved inhibition of  
95 several RNA viruses, including SARS-CoV-2 (7-9).  $M^{pro}$  is a cysteine protease that is a  
96 promising target. It is responsible for the catalytic cleavage of the conserved regions of  
97 polyproteins PP1a and PP1ab, and its blockade inhibits the synthesis of many nonstructural  
98 proteins that are crucial for viral proliferation (10). Nirmatrelvir and ritonavir are co-  
99 administered oral antiviral drugs with the trade name Paxlovid. This drug acts as an irreversible  
100 inhibitor of the  $M^{pro}$  of SARS-CoV-2.

101 Combination therapy with two distinct drugs has led to different results, such as antagonistic,  
102 synergistic, and additive effects (11). In general, the synergistic and additive effects of  
103 combination therapy are significant and are facilitated by targeting multiple pathways of the  
104 virus replication machinery. Viral diseases caused by human immunodeficiency virus (HIV),  
105 hepatitis C virus (HCV), and influenza are classic examples, for which combination therapy  
106 has become the benchmark treatment (12-16). Although combination therapy does not always  
107 end in a cure, it can significantly improve quality of life and prolong life because of increased  
108 therapeutic efficacy and prevention of the development of drug resistance. In addition to  
109 historical experience in the treatment of viral diseases, there have been some recent studies on  
110 combination therapy synergistically reducing the SARS-CoV-2 load (11, 17). Combination  
111 therapy has been suggested as potent and effective when it targets different mechanisms and  
112 processes of the virus life cycle, such as the proteases ( $M^{pro}$ ) and polymerases (RdRp) of SARS-

113 CoV-2. Furthermore, although there are several ongoing clinical studies with monotherapies,  
114 very few clinical studies have used combination therapies. Moreover, *in vivo* information in  
115 the context of SARS-CoV-2 infection is essential before considering combination therapy for  
116 clinical studies. Small-animal models that accurately mimic human disease usually afford  
117 fundamental insights into the pathogenesis of SARS-CoV-2 infection (18-20). K18-hACE2  
118 transgenic mice with the human angiotensin I-converting enzyme 2 (ACE2) receptor  
119 predominantly express hACE2 under the control of the cytokeratin-18 promoter (KRT18) and  
120 have been proposed as a model for the study of antiviral agents (21). In the context of hACE2  
121 expression, mice have been shown to develop severe lung pathology and impaired lung  
122 function, with accompanying neuronal death, upon SARS-CoV-2 infection (18, 22).

123 Screening FDA-approved antiviral drugs for efficacy against SARS-CoV-2 will help reduce  
124 the global impact of the current pandemic. Additionally, such an approach strongly emphasizes  
125 the practical and clinical need to develop appropriate combination therapies and increase access  
126 to COVID-19 patients, especially for high-risk groups. Therefore, we performed an *in vivo*  
127 study using a SARS-CoV-2-infected hACE2 transgenic mouse model and evaluated the  
128 potential efficacy of the drugs nirmatrelvir (NTV), remdesivir (RDV), and molnupiravir (MPV)  
129 and their combinations, nirmatrelvir and remdesivir (NTV-RDV) and nirmatrelvir and  
130 molnupiravir (NTV-MPV). We summarized our therapeutic insights into these drug  
131 combinations, which are of clinical significance, and we provided an alternative prescription  
132 for a more effective drug regimen for treating SARS-CoV-2 patients.

## 133 **RESULTS**

134 *Therapeutic efficacy of nirmatrelvir, remdesivir, and molnupiravir in SARS-CoV-2-infected*

135 *mice*

136 The treatment dose and infectious virus titer optimization in mice was defined by the criteria  
137 of the lowest dose with maximum therapeutic efficacy at the assigned time points. The  
138 suboptimal mouse lethal dose (MLD50) for the infected mice was determined by infecting the  
139 mice with various titers of Beta-CoV/Korea/KCDC03/2020 (Fig S1). We conducted two dose-  
140 optimization studies (10 and 20 mg/kg body weight) to determine the low-dose therapeutic  
141 efficacy using hACE-2 transgenic mice (Fig S1A and S1B). Based on the weight change,  
142 survival, viral load reduction, and pathology-related aspects, we determined that a 20 mg/kg  
143 body weight dose was optimal for low-dose therapeutic efficacy *in vivo* (Fig S2).

144 To evaluate the therapeutic efficacy of NTV, RDV, and MPV, mice were infected with 5  
145 MLD50 of SARS-CoV-2 followed by administration via oral gavage of 20 mg/kg body weight  
146 NTV and MPV and intraperitoneal administration of RDV alone. Six hours after the onset of  
147 infection, treatment was started on the same day and continued twice daily for five consecutive  
148 days (Fig 1A). As body weight loss is a crude marker for viral pathogenesis, mice were  
149 monitored daily from day 0 (0 DPI) for body weight changes, and all mice continued to lose  
150 weight from 5 DPI and showed a maximum weight loss by 7 or 8 DPI. No protection against  
151 weight loss was observed in RDV-treated mice (20.5%) compared to that in mock-treated mice  
152 (21.5%) by 7 DPI, whereas approximately 5-6% protection against weight loss was observed  
153 in NTV- and MPV-treated animals (Fig 1B). Congruent with protection against weight loss,  
154 NTV (P= 0.0001) and MPV (P= 0.0001) produced significantly higher (36% and 43%) survival,  
155 respectively, while RDV (P=0.1172) produced a lower (21%) survival rate than that observed  
156 with mock treatment. The survival rates of the NTV- (P=0.0197) and MPV-treated (P=0.0055)

157 animals were significantly higher than that of the RDV-treated animals (Fig 1C). In addition to  
158 the improvement in body weight and survival, the NTV- (P= 0.0001) and MPV-treated mice  
159 (P= 0.0001) exhibited significantly higher clinical scores than RDV-treated mice from 5 DPI  
160 (Fig 1D). We analyzed the therapeutic effect of these antivirals on the survival probability of  
161 mice. As changes in brain tissues and neurological involvement potentially contributed to the  
162 lethality of the K18-hACE2 mice, we focused on the brain along with the lung. Therefore,  
163 tissues were collected from both the lung and brain at 5 DPI for viral titer assessment and  
164 histopathological and immunohistochemical analysis. We assessed the replication capability of  
165 the virus in the brain and lungs via TCID50 and RT-qPCR. Titers reduced by 0.7, 0.4, and 1  
166 log<sub>10</sub> TCID50 were observed in the lung tissue of NTV (P=0.1987), RDV- (P=0.7062) and  
167 MPV-treated (P=0.05714) mice, respectively, compared to those in mock-treated mice (Fig 2A).  
168 We further evaluated the viral titer reduction among these treated animals and observed a better  
169 log<sub>10</sub>TCID50 titer reduction in the MPV-treated animals than in the NTV and RDV-treated  
170 animals (Fig 2A). The same scenario regarding the viral titer was also observed in brain tissue,  
171 which has low viral replication potential (Fig 2A). To determine the relationship between the  
172 viral titer and viral RNA copy number in tissue samples, we further performed RT-qPCR on  
173 parallel tissues used for TCID50. As with the TCID50, the same trend was observed in RNA  
174 copy numbers, where, compared to RDV-treated animals, MPV-treated animals showed  
175 significantly higher copy number reduction in the lung and brain; however, this reduction was  
176 not significantly higher compared to that observed in NTV-treated animals (Fig 2B and 2C).  
177 We evaluated the viral antigen levels by immunochemistry and histopathological changes  
178 determined by H&E staining of lung and brain tissues at 5 DPI. No potent decrease in the  
179 expression levels of the SARS-CoV-2 N protein was observed in the RDV-treated animals,



180 whereas a reduction in viral distribution was observed in the NTV and MPV-treated animals,  
181 with a greater reduction in the MPV-treated animals (Fig 3A and 3B). H&E staining revealed  
182 reduced pulmonary damage in the alveolar and peribronchiolar regions of the lung slices of  
183 MPV-treated animals at 5 DPI (Fig 3A). Severe inflammation was observed in the brains of the  
184 mock-treated mice at 5 DPI, whereas, compared to the animals in the other groups, the NTV  
185 and MPV-treated animals exhibited alleviation of such changes (Fig 3B). All these findings  
186 demonstrate that MPV, a nucleotide analog that targets the conserved RdRp, is efficient in  
187 diminishing the infectious SARS-CoV-2 burden and is further associated with better survival  
188 compared with that with other monotherapy treatments.

189 *The combination of nirmatrelvir and remdesivir demonstrated less antiviral activity, with a*  
190 *lower survival rate, in an in vivo model*

191 Combination treatment is considered more effective than single-drug treatment, so we  
192 examined the therapeutic benefits of NTV and RDV combination therapy in SARS-CoV-2-  
193 infected mice. Unfortunately, the combination of NTV and RDV did not result in any  
194 significant benefits and yielded the same or less antiviral action as NTV monotherapy. Despite  
195 the lack of superior protection afforded by this combination regarding weight loss compared to  
196 that with a mock-treatment and RDV treatment (Fig 1B), it resulted in approximately 7% lower  
197 survival compared to that with NTV monotherapy (Fig 1C). As shown in Figure 2, it also failed  
198 to inhibit viral replication in both the lungs and the brain and thus produced antagonistic  
199 activity compared to that of NTV monotherapy (Fig 2). Although the overall pathological  
200 changes in the lungs and brain of the combination-treated mice were similar to those of mock-  
201 treated and RDV-treated mice at 5 DPI, the combination produced an inefficient therapeutic

202 effect (Fig 3).

203 *Nirmatrelvir and molnupiravir combination therapy conferred enhanced survival to SARS-*  
204 *CoV-2-infected mice*

205 Since only modest survival benefits were observed with the NTV-RDV combination, we further  
206 tested another combination with the same therapeutic targets, NTV and MPV, to determine if  
207 the result would be functionally synergistic, additive, or optimal. Hence, we administered NTV  
208 together with MPV (20 mg/kg body weight each) to mice and observed more promising results  
209 than those with either of the drugs administered alone. Along with the NTV and MPV single-  
210 drug treatments, the NTV-MPV combination treatment also exhibited protective efficacy  
211 against weight loss (15.5%) compared to that mock-treatment (21.5%) (P=0.0176) at 7 DPI  
212 (Fig 1B). This protection against weight loss was 4.7-5.5% better than that with RDV and the  
213 NTV-RDV combination; however, this effect was neither synergistic nor significant in animals  
214 that received the NTV or MPV drugs alone (Fig 1B). Furthermore, in addition to enhanced  
215 protection against body weight loss, mice treated with this combination showed a rapid  
216 improvement in body weight recovery compared to that of animals treated with other drugs.  
217 Remarkably, the NTV-MPV combination drug-treated animals did not exhibit any rapid decline  
218 in the clinical score, as did other treated animals (Fig 1D). Additionally, a rapid increase in the  
219 clinical score was observed from 8 DPI in the NTV-MPV combination group, while other  
220 groups maintained only moderate progress in their clinical score (Fig 1D). The optimal survival  
221 probability was exhibited by NTV, RDV, MPV, and NTV-RDV-treated animals, which was  
222 largely improved to more than 80% with NTV-MPV combination therapy, exhibiting synergetic  
223 and significant protection compared to that with NTV (P=0.0001) or MPV (P=0.0001)

224 monotherapy (Fig 1C). Similarly, the improvement in survival associated with this combination  
225 was substantially greater than that associated with RDV monotherapy ( $P= 0.0001$ ) or NTV-  
226 RDV combination ( $P= 0.0001$ ) treatment. When we compared the viral replication with this  
227 combination in the lungs and brain with that with mock and other treatment groups, we found  
228 that the combination significantly reduced viral replication. The NTV-MPV combination  
229 reduced the  $\log_{10}$  TCID50 viral titers by 1.4 at 5 DPI in the lung ( $P=0.0019$ ), whereas the  $\log_{10}$   
230 TCID50 viral titer was reduced by 4.2 in the brain ( $P=0.0091$ ) compared to that with mock  
231 treatment (Fig 2A). Additionally, with the combination therapy, the virus titer was reduced by  
232 0.65, 0.9, 0.45, or 0.95  $\log_{10}$  TCID50 in the lung compared to that with the NTV, RDV, or MPV  
233 monotherapy or NTV-RDV combination, respectively. We further observed significant viral  
234 inhibition by this combination in the brain tissue compared with that with the mock-treatment;  
235 however, the difference between NTV and MPV monotherapy was not significant. The viral  
236 RNA expression was significantly inhibited in the NTV-MPV-treated group than in the other  
237 treatment groups except for MPV-treated for both RdRp and N genes in the lung, whereas it  
238 was only significant with the mock and RDV-treated groups in the brain (Fig 2B and 2C).  
239 Excessive viral titer reduction in the brains of NTV-MPV-treated mice compared to other  
240 groups revealed that administration of the NTV-MPV combination may be more beneficial than  
241 other therapies in reducing the lung virus load and preventing the spread of SARS-CoV-2  
242 beyond the respiratory system. The NTV-MPV combination-treated groups exhibited greater  
243 recovery of lung impairment, lung inflammation, and other related issues at 5 DPI than the  
244 other treated groups (Fig 3A). None to moderate reduction of bronchiolitis, alveolitis, and  
245 encephalitis with neutrophils and macrophages was observed in the monotherapy and NTV-  
246 RDV treated groups, whereas effective reduction of all these lesions was observed in the NTV-

247 MPV combination-treated animals at 5 DPI (Fig 3).

## 248 **DISCUSSION**

249 Despite the widespread availability of vaccines, the unrestrained SARS-CoV-2 pandemic needs  
250 advancement of effective antiviral therapy development to adeptly target most of the emerging  
251 SARS-CoV-2 strains and further support clinical outcomes with greater clinical utility,  
252 especially for high-risk groups (23). In October 2020, the FDA approved RDV and  
253 recommended the treatment of hospitalized patients with severe COVID-19 in many countries.  
254 These recommendations are partly based on the belief that the use of RDV could reduce  
255 recovery time, allowing faster discharge of patients from hospitals during the pandemic. In  
256 contrast, several clinical studies have highlighted the lack of survival benefits associated with  
257 RDV and the WHO has recently recommended against the use of RDV for hospitalized patients.  
258 Later, MPV was recognized for its therapeutic and prophylactic potential and was recently  
259 approved for emergency use by regulatory agencies. Significant clinical benefits have been  
260 observed for patients who have been administered MPV orally (8, 24-26). NTV is an essential  
261 component of Paxlovid, which impedes the main protease of SARS-CoV-2 and has recently  
262 been reported to reduce the risk of hospitalization or death in COVID-19 patients by 89% (27,  
263 28). Antiviral therapy with a combination of drugs that can target viral replication and entry  
264 machinery components is more efficient in eradicating viruses and can undoubtedly improve  
265 the clinical outcomes and survival probability of hospitalized patients. As such, we evaluated  
266 the therapeutic efficacy of NTV, RDV, and MPV and their combinations in SARS-CoV-2-  
267 infected K18-hACE2 transgenic mice and demonstrated the superior antiviral activity of the  
268 NTV-MPV combination compared with those of NTV, MPV, RDV, and NTV-RDV.

269 Antivirals such as RDV, MPV, and Paxlovid target highly conserved enzymes involved in virus  
270 replication that have remained relatively invariant as new VOCs have emerged (29). The  
271 extensive use of RDV has been restricted by the necessity of delivery by intravenous infusion,  
272 which requires access to qualified health care staff and facilities. The FDA and EUA recently  
273 authorized two oral antivirals, MPV and Paxlovid, available to specific outpatient populations,  
274 which are likely to have a positive impact on public health by reducing the duration of the  
275 disease and preventing hospitalization of high-risk individuals. However, cost and accessibility  
276 will ultimately determine their global utility. We utilized the K18-hACE2 mouse model, as it  
277 is more susceptible to SARS-CoV-2 infection. The K18-hACE2 mouse is an ideal model, as  
278 the disease-induced is reminiscent of severe COVID-19 patients with severe pathological  
279 changes in both the lung and brain, morbidity, and mortality, as previously reported (18, 22).  
280 Upon SARS-CoV-2 infection, these mice showed a sensitive and rapid response to viral  
281 replication, clinical parameters, weight loss by 4 or 5 DPI, and lethality by 7-8 DPI, whereas  
282 other models exhibit a mild response (30). As described in previous studies (31, 32), all NTV,  
283 RDV, and MPV-mono-treated animals also exhibited similar dynamics in terms of weight loss,  
284 viral titer, pulmonary function, lung pathology, and virus-induced death. Comparable weight  
285 loss was observed between mock and RDV-treated animals, whereas NTV and MPV-treated  
286 animals had lower body weight loss and higher body weight recovery, with higher significance  
287 for MPV. Furthermore, mice treated with MPV had a lower viral burden and sub-genomic viral  
288 RNA level than mice treated with other drugs, which was consistent with a previous report and  
289 indicated the ability of MPV to reduce virus replication (33). As viral burden and clinical  
290 pathology correlate, our study is also reminiscent of this phenomenon and showed that mice  
291 treated with MPV exhibited decreased clinical severity, with improvement in the clinical score,

292 pathophysiological changes, and viral distribution compared with those in other treatment  
293 groups. According to several studies, NTV and RDV antivirals exhibited survival rates of 36%  
294 and 21%, respectively, while MPV-treated animals had approximately 7 and 22% higher  
295 survival rates than NTV and RDV-treated animals, respectively animals (6, 26, 34). Recent  
296 clinical studies suggest that RDV does not play a significant role in mortality, but it still plays  
297 a major role in reducing the duration and severity of illness, an important outcome when  
298 hospitals are overcrowded with patients with COVID-19 (35-38). In support of these studies,  
299 our *in vivo* study also clearly illuminates the survival benefits unrelated to RDV monotherapy,  
300 which resulted in only 21% survival, although it may be of clinical significance because it has  
301 yielded improved weight loss recovery and clinical scores. Collectively, we confirmed that the  
302 three antivirals have therapeutic significance against SARS-CoV-2 pathogenesis in the K18-  
303 hACE2 mouse model, with lower protection afforded by RDV and higher protection afforded  
304 by MPV.

305 The antiviral potency of the drug combinations against SARS-CoV-2 viral infection *in vitro*  
306 has been depicted (17, 39); however, there are limited studies available on FDA-approved drugs  
307 *in vivo* models. Since the three individual drugs studied showed therapeutic effects, we further  
308 evaluated the therapeutic efficacy of the drugs in combination with each other to consider  
309 whether the combination could show synergistic antiviral activity compared to that with  
310 monotherapy. This study was the first to examine the value of combination therapy with NTV-  
311 RDV and NTV-MPV combinations against SARS-CoV-2 infection in an animal model and,  
312 more importantly, the ability of combination therapy to extend the treatment window.  
313 Furthermore, potential side effects with a high dose and poor therapeutic potency with a low  
314 dose must be considered. These limitations can be overcome by the application of the

315 synergistic action of the currently employed suboptimal dose of the NTV-MPV combination.  
316 We reported here that the suboptimal dose (20 mg/kg body weight) drug combinations  
317 produced the same pattern in protection against weight loss; however, NTV-MPV yielded a  
318 significantly better clinical score than NTV-RDV, emphasizing the importance of the NTV-  
319 MPV combination in preventing the clinical progression of the disease. Interestingly, the  
320 clinical score associated with NTV-RDV was significantly lower than that with NTV or MPV  
321 monotherapy, which is a considerable factor when recommending this combination therapy for  
322 the treatment of SARS-CoV-2 infection. The favipiravir and MPV combination has recently  
323 been reported to reduce the viral load better than monotherapy in SARS-CoV-2-infected mice  
324 (40). The reduced viral load with the NTV-MPV combination is superior to that in animals  
325 treated with the other drugs at 5 DPI, representing the clinical significance of this combination  
326 in the clearance of the virus. Combinations of different drugs, such as ribavirin-favipiravir and  
327 oseltamivir-azithromycin in Lassa virus and influenza-infected mice, respectively,  
328 substantially extended the survival period and led to a better survival rate compared to those  
329 with monotherapy (41, 42). Mice treated with the NTV-MPV combination had a significantly  
330 reduced viral distribution in the lungs as well as in the brain and ultimately exhibited 80%  
331 survival, while mice treated with other drugs exhibited a lower (<45%) survival rate. Moreover,  
332 this achieved survival rate is more pronounced than expected from the additive activity of NTV  
333 or MPV monotherapies. Together, these data reveal that the administration of the NTV-MPV  
334 combination can considerably diminish virus replication in the early onset of the disease, where  
335 the predominant viral load is usually expected, limiting deleterious COVID-19 infectious  
336 events.  
337 Although the overall results of this study are encouraging for their clinical significance, some

338 limitations are also notable. Our results support the need for the characterization of the  
339 pharmacodynamic and pharmacokinetic properties, mainly the toxicity, of the NTV-MPV  
340 combination in appropriate animal models and humans before treating COVID-19 patients.  
341 Combination therapy has been associated with the acquisition of fewer genomic mutations;  
342 however, there is an advantage to examining the genetic mutation of the SARS-CoV-2 virus  
343 against this combination therapy. Our research demonstrated that three studied antiviral drugs  
344 had therapeutic potential by diminishing the viral burden, rescuing the lung and brain pathology,  
345 and ultimately improving life expectancy by 20-40%. The NTV-MPV combination was highly  
346 protective against lethal SARS-CoV-2 infection and yielded a survival rate of approximately  
347 80% by controlling all pathological features associated with morbidity and mortality.  
348 Combination therapy with different drugs affects different portions of the viral life cycle and  
349 may be a beneficial strategy based on their mechanisms of action against SARS-CoV-2  
350 infection. We achieved such a potential effect while applying a combinatorial approach with  
351 NTV-MPV combination therapy and presented *in vivo* evidence of the potential utility of this  
352 combination in treating SARS-CoV-2 patients.

## 353 **MATERIAL AND METHODS**

### 354 *Ethics statement*

355 The care and maintenance of the animals and animal housing followed the recommendations  
356 and guidelines provided by the Ministry of Food and Drug Safety, Republic of Korea. This  
357 study was approved by the institutional animal care and use committee of Chungbuk National  
358 University, Republic of Korea (CBNUA-1659-22-01), and all experimental protocols strictly  
359 adhered to committee guidelines.



360 *Cells and virus*

361 Vero E6 cells (African green monkey kidney cells, ATCC®, cat# CRL-1586™) were  
362 maintained in Dulbecco's modified Eagle's medium (DMEM) containing 10% (w/v) fetal  
363 bovine serum (FBS), 4.0 mM L-glutamine, 110 mg/L sodium pyruvate, 4.5 g/L D-glucose and  
364 1% antibiotic-antimycotic at 37 °C and 5% CO<sub>2</sub>.

365 The virus Beta-CoV/Korea/KCDC03/2020 (NCCP43326) used for this study was obtained  
366 from the National Culture Collection for Pathogens, Republic of Korea. It was propagated in  
367 Vero E6 cells maintained in DMEM supplemented with 2% FBS and 1% antibiotic-antimycotic  
368 at 37 °C and 5% CO<sub>2</sub>. All the infection work related to SARS-CoV-2 was carried out in the  
369 biosafety level 3 (BSL3) and animal BSL3 (ABSL3) facilities at Chungbuk National University  
370 per the institutional ethical committee standards.

371 *Compound sources*

372 Nirmatrelvir and molnupiravir were purchased from MedChemExpress (Monmouth Junction,  
373 USA). Remdesivir was purchased from Ambeed (Illinois, USA). Stock solutions of all these  
374 antiviral drugs were prepared in 2% DMSO and 20% sulfobutylether-β-cyclodextrin  
375 (MedChemExpress) in 0.9% saline and stored at -20 °C.

376 *SARS-CoV-2 infection in K18-hACE2 mice and treatment regimen*

377 Eight-week-old female C57BL/6 Cg-Tg(K18-ACE2)2Prlmn/J mice were obtained from  
378 Jackson Laboratory, USA, and maintained in a pathogen-free ABSL3 facility at the desired  
379 humidity, temperature, and day/night conditions. All experimental mice were divided into 7  
380 groups with 14 mice in each group: group 1: mock-treated, group 2: NTV (20 mg/kg), group  
381 3: RDV (20 mg/kg), group 4: MPV (20 mg/kg), group 5: NTV (20 mg/kg) + RDV (20 mg/kg),

382 group 6: NTV (20 mg/kg) + MPV (20 mg/kg), and group 7: vehicle. Mice were anesthetized  
383 by isoflurane inhalation and inoculated with 5 MLD50 of Beta-CoV/Korea/KCDC03/2020 in  
384 50  $\mu$ L. NTV and MPV were administered orally for treatment, and RDV was given  
385 intraperitoneally twice daily (b.i.d.) for five days starting at 6 hours post-infection (dpi). The  
386 combinatorial treatment of MPV or RDV was applied after administering NTV.

### 387 *Weight, clinical score, and survival*

388 The body weight changes and survival of SARS-CoV-2-infected mice were monitored daily  
389 for 14 days. The mice were also monitored and scored for clinical symptoms daily up to 14  
390 days post-infection (DPI) via a clinical scoring system used to monitor disease progression and  
391 establish human endpoints (18). The categories included body weight, appearance (fur, eye  
392 closure), activity, and movement, which were evaluated according to standard guidelines with  
393 a maximum score of 11. The mice were sacrificed when they lost  $\geq 25\%$  of their initial pre-  
394 infection body weight. Lung and brain tissues were collected at 5 DPI (n = 5/group) to  
395 determine viral titers, viral RNA copies, histopathology (hematoxylin and eosin; H&E), and  
396 immunohistochemistry and stored at  $-80\text{ }^{\circ}\text{C}$  for further use.

### 397 *Infectious viral titer estimation*

398 The coinfection method was used to estimate the viral titer in homogenized lung and brain  
399 tissues. Briefly, the tissues were homogenized with bead disruption and centrifuged at 12,000  
400 rpm for 5 min. The 10-fold serially diluted virus-containing samples were then used to infect  
401  $0.2 \times 10^6$  Vero E6 cells per well in a 96-well plate and cultured in a 5% CO<sub>2</sub> incubator at 37  $^{\circ}\text{C}$   
402 for 4 days or until an apparent cytopathic effect (CPE) was detected and further visualized by  
403 0.2% crystal violet staining. The titer was calculated according to the Reed and Muench method

404 and was expressed in  $\log_{10}$  50% tissue culture infection dose (TCID<sub>50</sub>) per mg of tissue (43).

#### 405 *Quantitation of SARS-CoV-2 RNA*

406 Isolation of RNA from homogenized lung and brain tissue was performed with a QIAamp Viral  
407 RNA Kit (QIAGEN) per the manufacturer's instructions, with slight modifications.  
408 Complementary DNA conversion and RT-qPCR were accomplished by a Bio-Rad Real-Time  
409 PCR System using a VBScript II One-Step RT-qPCR Probe Kit (Seegene Inc.). Viral genome  
410 copies of each of the RdRp and N genes of the SARS-CoV-2 viral RNA were counted on the  
411 Ct values using the matrix gene-based real-time reverse transcriptase-polymerase chain  
412 reaction (44).

#### 413 *Histopathology and immunohistochemistry analysis*

414 Mouse lung and brain tissues collected at 5 DPI were fixed with 10% formalin neutralization  
415 buffer (Sigma Aldrich). The paraffin-embedded tissue sections were stained with H&E for  
416 evaluation of the histopathological score by a pathologist. The semiquantitative scoring system  
417 (0 - normal, 1 - mild, 2 - moderate, and 3 - severe) was applied by examining the tissues under  
418 digital microscopy as described previously (18, 45, 46). The cumulative scoring system was  
419 applied by considering perivascular inflammation, bronchiolar epithelial necrosis, bronchiolar  
420 epithelial necrosis regeneration, bronchiolar inflammation, alveolar inflammation, and  
421 perivascular edema. Immunoreactivity in the lung tissues was assessed using a rabbit anti-  
422 SARS-CoV-2 Nucleocapsid pAb as the primary antibody (Sinobiological, China) and further  
423 processed using a Ventana Discovery Ultra (Roche, USA) system.

#### 424 *Statistical analysis*

425 All statistical data were analyzed using GraphPad Prism 9 (GraphPad, San Diego, USA) and

426 SPSS 26 (IBM SPSS, New York, USA) software. Statistical significance among different  
427 groups was determined using a one-way analysis of variance (ANOVA) followed by Tukey's  
428 multiple comparisons test. Survival analysis was performed using the Kaplan–Meier method,  
429 and differences were calculated using the log-rank Mantel-Cox test. P values of \* $p < 0.05$ , \*\* $p$   
430  $< 0.01$ , and \*\*\* $p < 0.001$  were considered to indicate a significant difference.

#### 431 **ACKNOWLEDGMENT**

432 This work was supported by grants from the Korea National Institute of Health, the Korea  
433 Disease Control and Prevention Agency (4861-312-320-01 to M-. S.S.), and the National  
434 Research Foundation of Korea (NRF-2021R1A2C2006961 to M-. S.S. and NRF-  
435 2020R1A5A2017476 to M-. S.S.).

#### 436 **CONFLICTS OF INTEREST**

437 The authors have no conflicts of interest relevant to this study to disclose.

#### 438 **REFERENCES**

- 439 1. World Health Organization. 2022. WHO coronavirus (COVID-19) dashboard.  
440 <https://covid19.who.int/>. Accessed
- 441 2. Kustin T, Harel N, Finkel U, Perchik S, Harari S, Tahor M, Caspi I, Levy R,  
442 Leshchinsky M, Ken Dror S. 2021. Evidence for increased breakthrough rates of SARS-  
443 CoV-2 variants of concern in BNT162b2-mRNA-vaccinated individuals. *Nature*  
444 *medicine* 27:1379-1384.
- 445 3. Wilhelm A, Widera M, Grikscheit K, Toptan T, Schenk B, Pallas C, Metzler M, Kohmer  
446 N, Hoehl S, Helfritz FA. 2021. Reduced neutralization of SARS-CoV-2 Omicron

- 447 variant by vaccine sera and monoclonal antibodies. MedRxiv.
- 448 4. VanBlargan LA, Errico JM, Halfmann PJ, Zost SJ, Crowe JE, Purcell LA, Kawaoka Y,  
449 Corti D, Fremont DH, Diamond MS. 2022. An infectious SARS-CoV-2 B. 1.1. 529  
450 Omicron virus escapes neutralization by therapeutic monoclonal antibodies. Nature  
451 medicine 28:490-495.
- 452 5. Beigel JH, Tomashek KM, Dodd LE, Mehta AK, Zingman BS, Kalil AC, Hohmann E,  
453 Chu HY, Luetkemeyer A, Kline S. 2020. Remdesivir for the treatment of Covid-19.  
454 New England Journal of Medicine 383:1813-1826.
- 455 6. Gottlieb RL, Vaca CE, Paredes R, Mera J, Webb BJ, Perez G, Oguchi G, Ryan P, Nielsen  
456 BU, Brown M. 2022. Early remdesivir to prevent progression to severe Covid-19 in  
457 outpatients. New England Journal of Medicine 386:305-315.
- 458 7. Wang Y, Li P, Solanki K, Li Y, Ma Z, Peppelenbosch MP, Baig MS, Pan Q. 2021. Viral  
459 polymerase binding and broad-spectrum antiviral activity of molnupiravir against  
460 human seasonal coronaviruses. Virology 564:33-38.
- 461 8. Wahl A, Gralinski LE, Johnson CE, Yao W, Kovarova M, Dinnon KH, Liu H, Madden  
462 VJ, Krzystek HM, De C. 2021. SARS-CoV-2 infection is effectively treated and  
463 prevented by EIDD-2801. Nature 591:451-457.
- 464 9. Toots M, Yoon J-J, Cox RM, Hart M, Sticher ZM, Makhsous N, Plesker R, Barrena AH,  
465 Reddy PG, Mitchell DG. 2019. Characterization of orally efficacious influenza drug  
466 with high resistance barrier in ferrets and human airway epithelia. Science translational  
467 medicine 11:eaax5866.
- 468 10. Mody V, Ho J, Wills S, Mawri A, Lawson L, Ebert MC, Fortin GM, Rayalam S, Taval  
469 S. 2021. Identification of 3-chymotrypsin like protease (3CLPro) inhibitors as potential

- 470 anti-SARS-CoV-2 agents. *Communications biology* 4:1-10.
- 471 11. Bobrowski T, Chen L, Eastman RT, Itkin Z, Shinn P, Chen CZ, Guo H, Zheng W,  
472 Michael S, Simeonov A. 2021. Synergistic and antagonistic drug combinations against  
473 SARS-CoV-2. *Molecular Therapy* 29:873-885.
- 474 12. Cohen J, Beaubrun A, Bashyal R, Huang A, Li J, Baser O. 2020. Real-world adherence  
475 and persistence for newly-prescribed HIV treatment: single versus multiple tablet  
476 regimen comparison among US medicaid beneficiaries. *AIDS Research and Therapy*  
477 17:1-12.
- 478 13. Akanbi MO, Scarsi K, Taiwo B, Murphy RL. 2012. Combination nucleoside/nucleotide  
479 reverse transcriptase inhibitors for treatment of HIV infection. *Expert opinion on*  
480 *pharmacotherapy* 13:65-79.
- 481 14. Kohli A, Osinusi A, Sims Z, Nelson A, Meissner EG, Barrett LL, Bon D, Marti MM,  
482 Silk R, Kotb C. 2015. Virological response after 6 week triple-drug regimens for  
483 hepatitis C: a proof-of-concept phase 2A cohort study. *The Lancet* 385:1107-1113.
- 484 15. Wang Y, Fan G, Salam A, Horby P, Hayden FG, Chen C, Pan J, Zheng J, Lu B, Guo L.  
485 2020. Comparative effectiveness of combined favipiravir and oseltamivir therapy  
486 versus oseltamivir monotherapy in critically ill patients with influenza virus infection.  
487 *The Journal of infectious diseases* 221:1688-1698.
- 488 16. Stanciu C, Muzica CM, Girleanu I, Cojocariu C, Sfarti C, Singeap A-M, Huiban L,  
489 Chiriac S, Cuciureanu T, Trifan A. 2021. An update on direct antiviral agents for the  
490 treatment of hepatitis C. *Expert opinion on pharmacotherapy* 22:1729-1741.
- 491 17. Li P, Wang Y, Lavrijsen M, Lamers MM, de Vries AC, Rottier RJ, Bruno MJ,  
492 Peppelenbosch MP, Haagmans BL, Pan Q. 2022. SARS-CoV-2 Omicron variant is

- 493 highly sensitive to molnupiravir, nirmatrelvir, and the combination. *Cell research*  
494 32:322-324.
- 495 18. Winkler ES, Bailey AL, Kafai NM, Nair S, McCune BT, Yu J, Fox JM, Chen RE,  
496 Earnest JT, Keeler SP. 2020. SARS-CoV-2 infection of human ACE2-transgenic mice  
497 causes severe lung inflammation and impaired function. *Nature immunology* 21:1327-  
498 1335.
- 499 19. Moreau GB, Burgess SL, Sturek JM, Donlan AN, Petri Jr WA, Mann BJ. 2020.  
500 Evaluation of K18-hACE2 mice as a model of SARS-CoV-2 infection. *The American*  
501 *journal of tropical medicine and hygiene* 103:1215.
- 502 20. Bao L, Deng W, Huang B, Gao H, Liu J, Ren L, Wei Q, Yu P, Xu Y, Qi F. 2020. The  
503 pathogenicity of SARS-CoV-2 in hACE2 transgenic mice. *Nature* 583:830-833.
- 504 21. McCray Jr PB, Pewe L, Wohlford-Lenane C, Hickey M, Manzel L, Shi L, Netland J,  
505 Jia HP, Halabi C, Sigmund CD. 2007. Lethal infection of K18-hACE2 mice infected  
506 with severe acute respiratory syndrome coronavirus. *Journal of virology* 81:813-821.
- 507 22. Bauer L, Laksono BM, de Vrij FM, Kushner SA, Harschnitz O, van Riel D. 2022. The  
508 neuroinvasiveness, neurotropism, and neurovirulence of SARS-CoV-2. *Trends in*  
509 *Neurosciences*.
- 510 23. Fontanet A, Autran B, Lina B, Kieny MP, Karim SSA, Sridhar D. 2021. SARS-CoV-2  
511 variants and ending the COVID-19 pandemic. *The Lancet* 397:952-954.
- 512 24. Rosenke K, Hansen F, Schwarz B, Feldmann F, Haddock E, Rosenke R, Barbian K,  
513 Meade-White K, Okumura A, Leventhal S. 2021. Orally delivered MK-4482 inhibits  
514 SARS-CoV-2 replication in the Syrian hamster model. *Nature communications* 12:1-8.
- 515 25. Cox RM, Wolf JD, Plemper RK. 2021. Therapeutically administered ribonucleoside

- 516 analogue MK-4482/EIDD-2801 blocks SARS-CoV-2 transmission in ferrets. *Nature*  
517 *microbiology* 6:11-18.
- 518 26. Jayk Bernal A, Gomes da Silva MM, Musungaie DB, Kovalchuk E, Gonzalez A, Delos  
519 Reyes V, Martín-Quirós A, Caraco Y, Williams-Diaz A, Brown ML. 2022. Molnupiravir  
520 for oral treatment of Covid-19 in nonhospitalized patients. *New England Journal of*  
521 *Medicine* 386:509-520.
- 522 27. Owen DR, Allerton CM, Anderson AS, Aschenbrenner L, Avery M, Berritt S, Boras B,  
523 Cardin RD, Carlo A, Coffman KJ. 2021. An oral SARS-CoV-2 Mpro inhibitor clinical  
524 candidate for the treatment of COVID-19. *Science* 374:1586-1593.
- 525 28. Mahase E. 2021. Covid-19: Pfizer's paxlovid is 89% effective in patients at risk of  
526 serious illness, company reports. *British Medical Journal Publishing Group*.
- 527 29. Martin R, Li J, Parvangada A, Perry J, Cihlar T, Mo H, Porter D, Svarovskaia E. 2021.  
528 Genetic conservation of SARS-CoV-2 RNA replication complex in globally circulating  
529 isolates and recently emerged variants from humans and minks suggests minimal pre-  
530 existing resistance to remdesivir. *Antiviral research* 188:105033.
- 531 30. Dong W, Mead H, Tian L, Park J-G, Garcia JI, Jaramillo S, Barr T, Kollath DS, Coyne  
532 VK, Stone NE. 2022. The K18-human ACE2 transgenic mouse model recapitulates  
533 non-severe and severe COVID-19 in response to an infectious dose of the SARS-CoV-  
534 2 virus. *Journal of virology* 96:e00964-21.
- 535 31. Sheahan TP, Sims AC, Graham RL, Menachery VD, Gralinski LE, Case JB, Leist SR,  
536 Pyrc K, Feng JY, Trantcheva I. 2017. Broad-spectrum antiviral GS-5734 inhibits both  
537 epidemic and zoonotic coronaviruses. *Science translational medicine* 9:eaal3653.
- 538 32. Douglas MG, Kocher JF, Scobey T, Baric RS, Cockrell AS. 2018. Adaptive evolution



- 539 influences the infectious dose of MERS-CoV necessary to achieve severe respiratory  
540 disease. *Virology* 517:98-107.
- 541 33. Fischer WA, Eron JJ, Holman W, Cohen MS, Fang L, Szewczyk LJ, Sheahan TP, Baric  
542 RS, Mollan KR, Wolfe CR. 2021. Molnupiravir, an oral antiviral treatment for COVID-  
543 19. *MedRxiv*.
- 544 34. Reis S, Popp M, Kuehn R, Metzendorf M-I, Gagyor I, Kranke P, Meybohm P, Skoetz  
545 N, Weibel S. 2022. Nirmatrelvir combined with ritonavir for preventing and treating  
546 COVID-19. *Cochrane Database of Systematic Reviews*.
- 547 35. Consortium WST. 2021. Repurposed antiviral drugs for Covid-19—interim WHO  
548 solidarity trial results. *New England Journal of Medicine* 384:497-511.
- 549 36. Consortium WST. 2022. Remdesivir and three other drugs for hospitalised patients with  
550 COVID-19: final results of the WHO Solidarity randomised trial and updated meta-  
551 analyses. *The Lancet* 399:1941-1953.
- 552 37. Ohl ME, Miller DR, Lund BC, Kobayashi T, Miell KR, Beck BF, Alexander B, Crothers  
553 K, Sarrazin MSV. 2021. Association of remdesivir treatment with survival and length  
554 of hospital stay among US veterans hospitalized with COVID-19. *JAMA network open*  
555 4:e2114741-e2114741.
- 556 38. Singh S, Khera D, Chugh A, Khera PS, Chugh VK. 2021. Efficacy and safety of  
557 remdesivir in COVID-19 caused by SARS-CoV-2: a systematic review and meta-  
558 analysis. *BMJ open* 11:e048416.
- 559 39. Rosales R, McGovern BL, Rodriguez ML, Rai DK, Cardin RD, Anderson AS, Sordillo  
560 EM, van Bakel H, Simon V, Garcia-Sastre A. 2022. Nirmatrelvir, molnupiravir, and  
561 remdesivir maintain potent in vitro activity against the SARS-CoV-2 Omicron variant.

562 BioRxiv.

563 40. Abdelnabi R, Foo CS, Kaptein SJ, Zhang X, Do TND, Langendries L, Vangeel L,  
564 Breuer J, Pang J, Williams R. 2021. The combined treatment of Molnupiravir and  
565 Favipiravir results in a potentiation of antiviral efficacy in a SARS-CoV-2 hamster  
566 infection model. *EBioMedicine* 72:103595.

567 41. Oestereich L, Rieger T, Lüdtkke A, Ruibal P, Wurr S, Pallasch E, Bockholt S, Krasemann  
568 S, Muñoz-Fontela C, Günther S. 2016. Efficacy of favipiravir alone and in combination  
569 with ribavirin in a lethal, immunocompetent mouse model of Lassa fever. *The Journal*  
570 *of infectious diseases* 213:934-938.

571 42. Ishaqui AA, Khan AH, Sulaiman SAS, Alsultan MT, Khan I, Naqvi AA. 2020.  
572 Assessment of efficacy of Oseltamivir-Azithromycin combination therapy in  
573 prevention of Influenza-A (H1N1) pdm09 infection complications and rapidity of  
574 symptoms relief. *Expert review of respiratory medicine* 14:533-541.

575 43. Reed LJ, Muench H. 1938. A simple method of estimating fifty per cent endpoints.  
576 *American journal of epidemiology* 27:493-497.

577 44. Lee D-H, Kwon J-H, Noh J-Y, Park J-K, Yuk S-S, Erdene-Ochir T-O, Nahm S-S, Kwon  
578 Y-K, Lee S-W, Song C-S. 2016. Viscerotropic velogenic Newcastle disease virus  
579 replication in feathers of infected chickens. *Journal of veterinary science* 17:115-117.

580 45. Zheng J, Wong L-YR, Li K, Verma AK, Ortiz ME, Wohlford-Lenane C, Leidinger MR,  
581 Knudson CM, Meyerholz DK, McCray PB. 2021. COVID-19 treatments and  
582 pathogenesis including anosmia in K18-hACE2 mice. *Nature* 589:603-607.

583 46. Yang S, Cao L, Xu W, Xu T, Zheng B, Ji Y, Huang S, Liu L, Du J, Peng H. 2022.  
584 Comparison of model-specific histopathology in mouse models of COVID-19. *Journal*

585 of Medical Virology.

586 **Figure legends**

587 **Figure 1:**

588 Evaluation of the therapeutic efficacy of nirmatrelvir, remdesivir, and molnupiravir  
589 monotherapies and their combinations, nirmatrelvir-remdesivir, and nirmatrelvir-molnupiravir,  
590 in SARS-CoV-2-infected K18-hACE2 transgenic mice. **(A)** Schematic illustration of the study  
591 design. Mice were infected with 5 MLD<sub>50</sub> of SARS-CoV-2 followed by administration of 20  
592 mg/kg drugs for 5 consecutive days. Disease progression and other clinical parameters were  
593 monitored until 14 DPI, and the brain and lung were collected at 5 DPI for viral titer estimation  
594 and histopathological and immunohistochemical analyses. **(B)** Body weight was monitored  
595 daily for 14 days and is expressed as a percentage relative to the initial body weight on day 0.  
596 **(C)** Kaplan–Meier plot of the survival of all the groups (log-rank Mantel-Cox; \*\* $p < 0.01$ ,  
597 \*\*\* $p < 0.001$ ). **(D)** The clinical score was evaluated by assessing appearance (fur, eye closure),  
598 activity, and movement from 0 DPI to 14 DPI, and the cumulative clinical score of mice in  
599 each group is indicated.

600 **Figure 2:**

601 Evaluation of the viral load in SARS-CoV-2-infected mice treated with nirmatrelvir, remdesivir,  
602 and molnupiravir monotherapies, their combinations, nirmatrelvir-remdesivir, and  
603 nirmatrelvir-molnupiravir. **(A)** Lungs and brains were collected at 5 DPI, and viral titers were  
604 estimated. The viral titer is expressed in log<sub>10</sub> PFU/mL, and the limit of detection is shown in  
605 a dotted line (one-way ANOVA with Tukey's multiple comparison test; \* $p < 0.05$ \*\* $p < 0.01$ ).

606 **(B)** Viral RdRp gene quantification in both the lungs and brain at 5 DPI was determined via  
607 RT-qPCR and results are expressed in 40-Ct (One-way ANOVA with Tukey's multiple  
608 comparison test; \* $p < 0.05$ , \*\* $p < 0.01$ , \*\*\* $p < 0.001$ ). **(C)** Viral N gene quantification in both  
609 the lung and brain at 5 DPI via RT-qPCR. The data are expressed in 40-Ct (one-way ANOVA  
610 with Tukey's multiple comparison test; \* $p < 0.05$ , \*\* $p < 0.01$ , \*\*\* $p < 0.001$ ).

611 **Figure 3:**

612 Histopathology and immunohistochemistry analysis of SARS-CoV-2-infected mice treated  
613 with 20 mg/kg body weight nirmatrelvir, remdesivir, and molnupiravir monotherapy and their  
614 combinations, nirmatrelvir-remdesivir, and nirmatrelvir-molnupiravir. **(A)** Pathological  
615 changes and virus distribution were measured at 5 DPI in the lung tissue by H&E staining and  
616 immunohistochemical staining with an anti-nucleocapsid antibody, respectively. Images are  
617 shown at both low (5X) and high (20X) power resolution. **(B)** Neuronal death and virus  
618 distribution were measured at 5 DPI in brain tissue by H&E staining and  
619 immunohistochemistry, respectively. Images are shown at low (10X) and high (20X) power  
620 resolutions.

621 **Supplementary figure legends**

622 **Figure S1:**

623 Lethal infection dose optimization of SARS-CoV-2 virus-infected K18-hACE2 transgenic  
624 mice. **(A)** The progression of body weight loss was measured daily until 14 DPI in mice  
625 infected with different doses of the Beta-CoV/Korea/KCDC03/2020 virus. Weight loss was  
626 measured as a percentage of the initial body weight at day 0. **(B)** Kaplan-Meier survival plot

627 of mice inoculated with different doses of the Beta-CoV/Korea/KCDC03/2020 virus.

628 **Figure S2:**

629 Dose-optimization studies for low-dose therapeutic efficacy determination using hACE-2  
630 transgenic mice infected with the Beta-CoV/Korea/KCDC03/2020 virus. **(A)** Depicted  
631 percentage of the body weight measured at 14 DPI in the infected mice therapeutically treated  
632 with 10 mg/kg and 20 mg/kg body weight drugs. **(B)** Kaplan–Meier survival plot of the mice  
633 treated with 10 mg/kg and 20 mg/kg body weight drugs.

634 **Figure S3:**

635 The weight comparison of the groups treated with mono and combination drugs at 7 DPI. A  
636 significant difference was detected between the nirmatrelvir-molnupiravir and mock-treated  
637 group (One-way ANOVA with Turkey’s multiple comparison tests).

638 **Figure S4:**

639 Histopathology and immunochemistry analysis of SARS-CoV-2-infected mice treated with 20  
640 mg/kg body weight different drugs. **(A)** Pathological changes and virus distribution were  
641 measured at 14 DPI, and images are shown at both low (5X) and high (20X) power resolution.  
642 **(B)** Neuronal death and virus distribution were measured at 14 DPI, and images are shown at  
643 both low (10X) and high (20X) power resolution.

**Figure 1.**

**A**

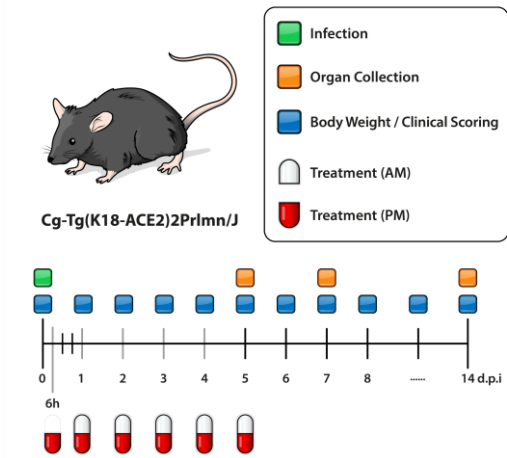

**B**

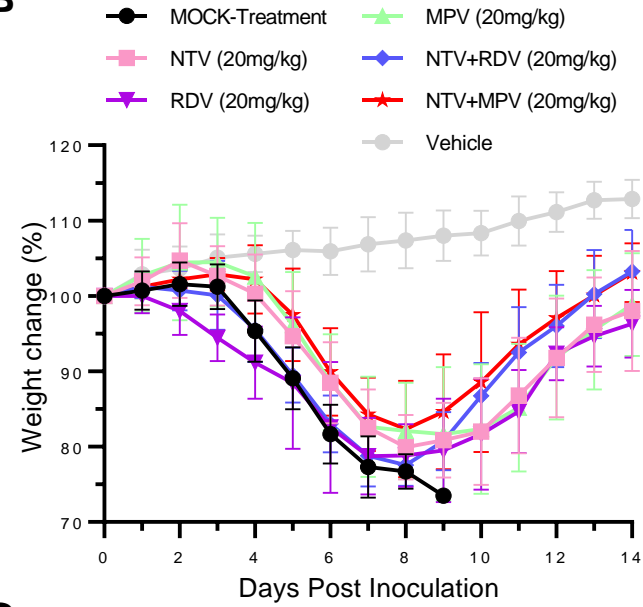

**C**

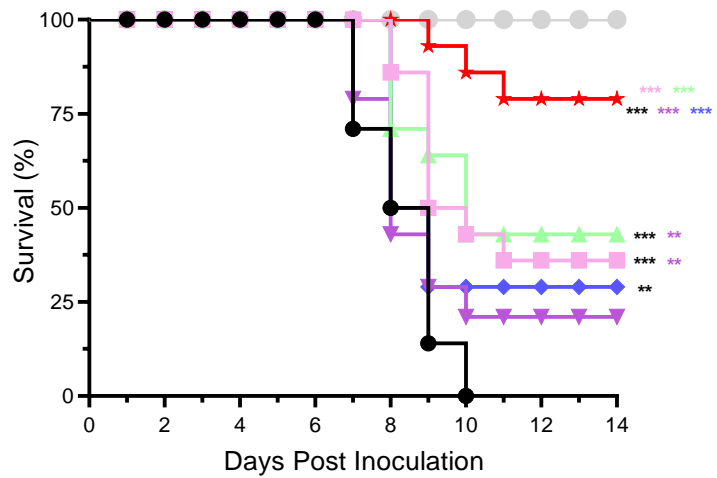

**D**

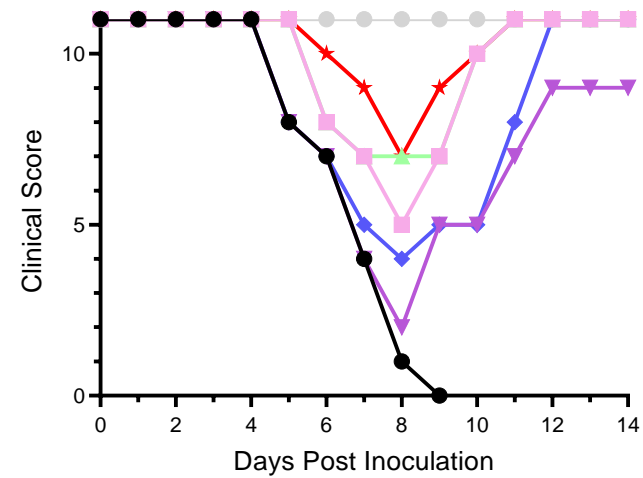

**Figure 2.**

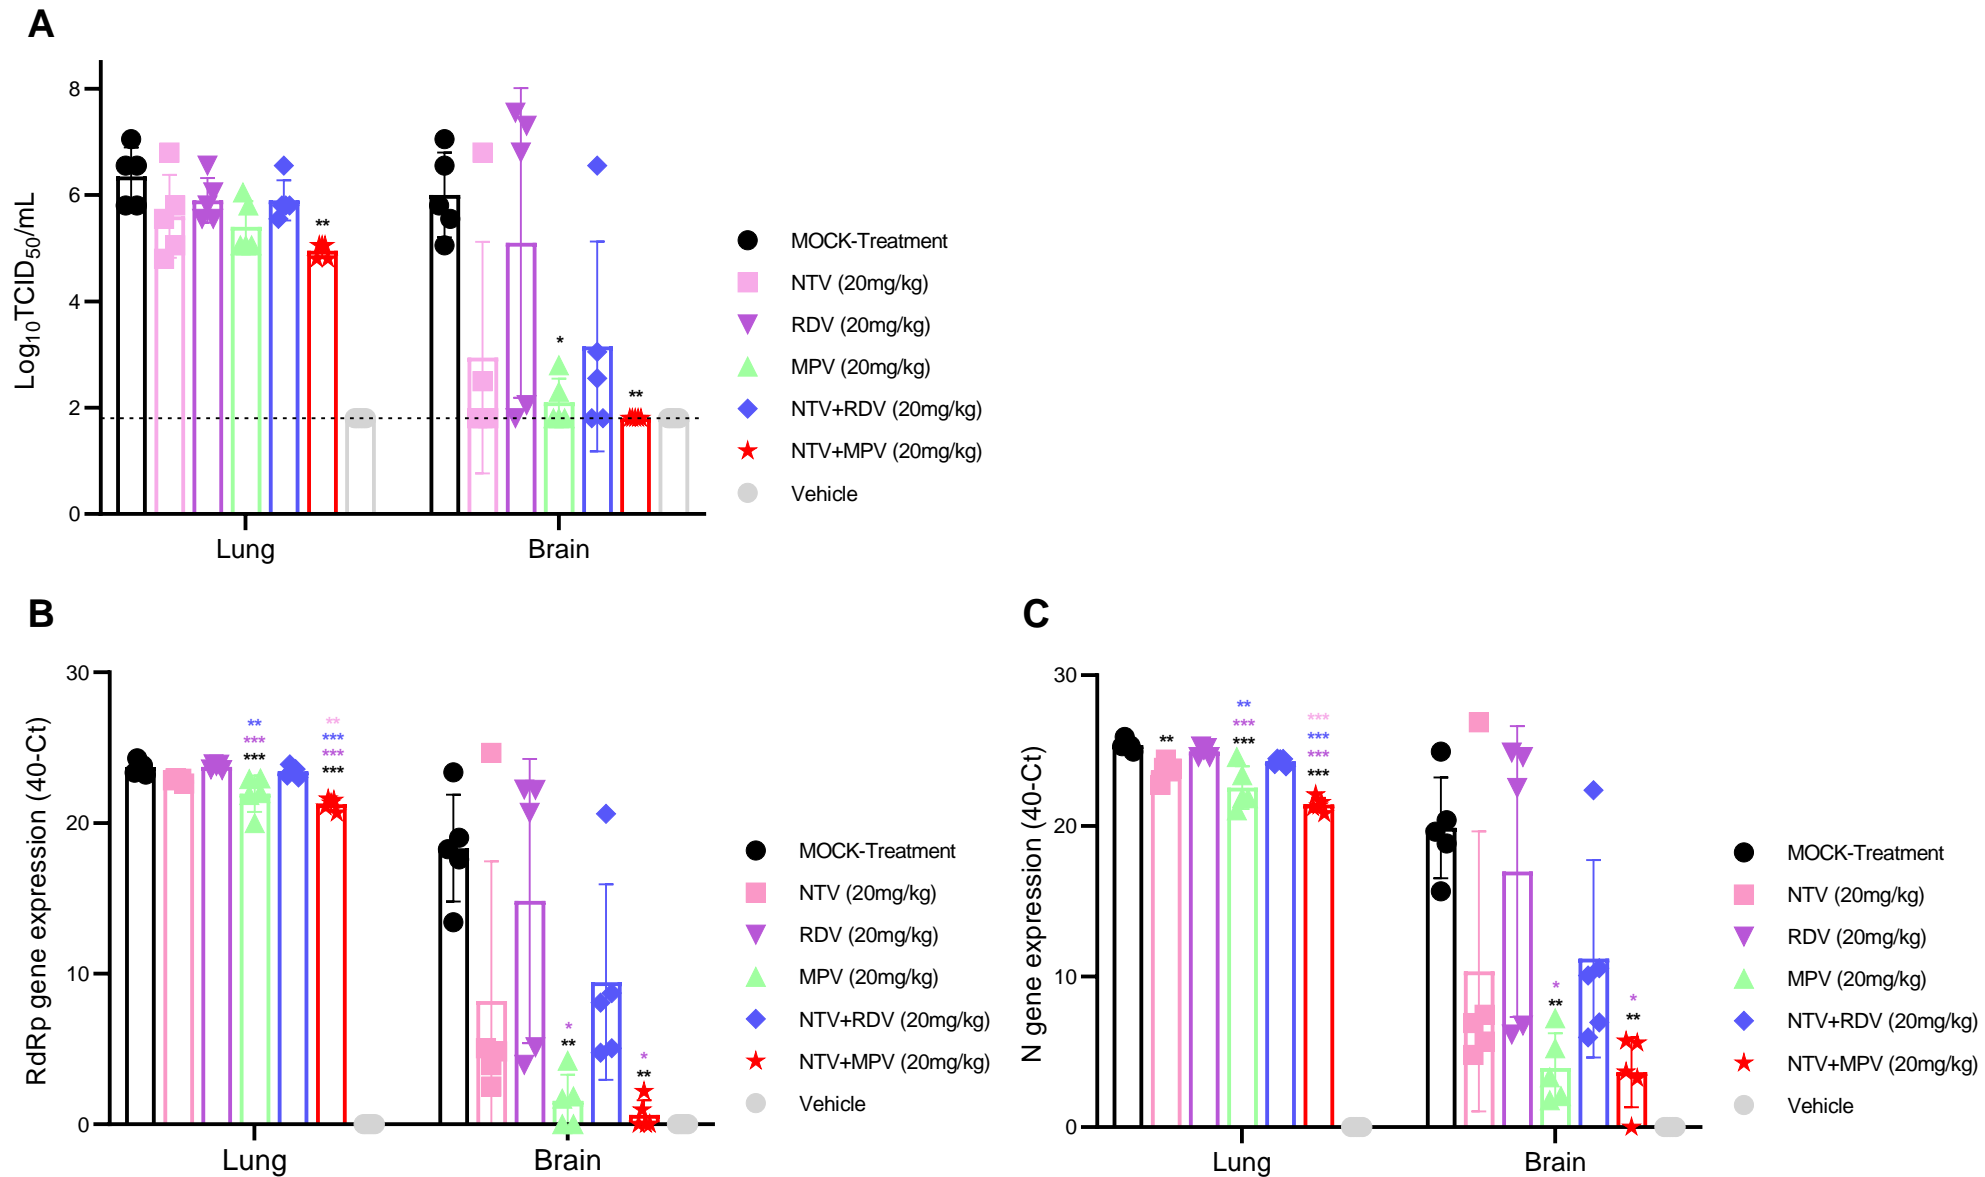

**Figure 3.**

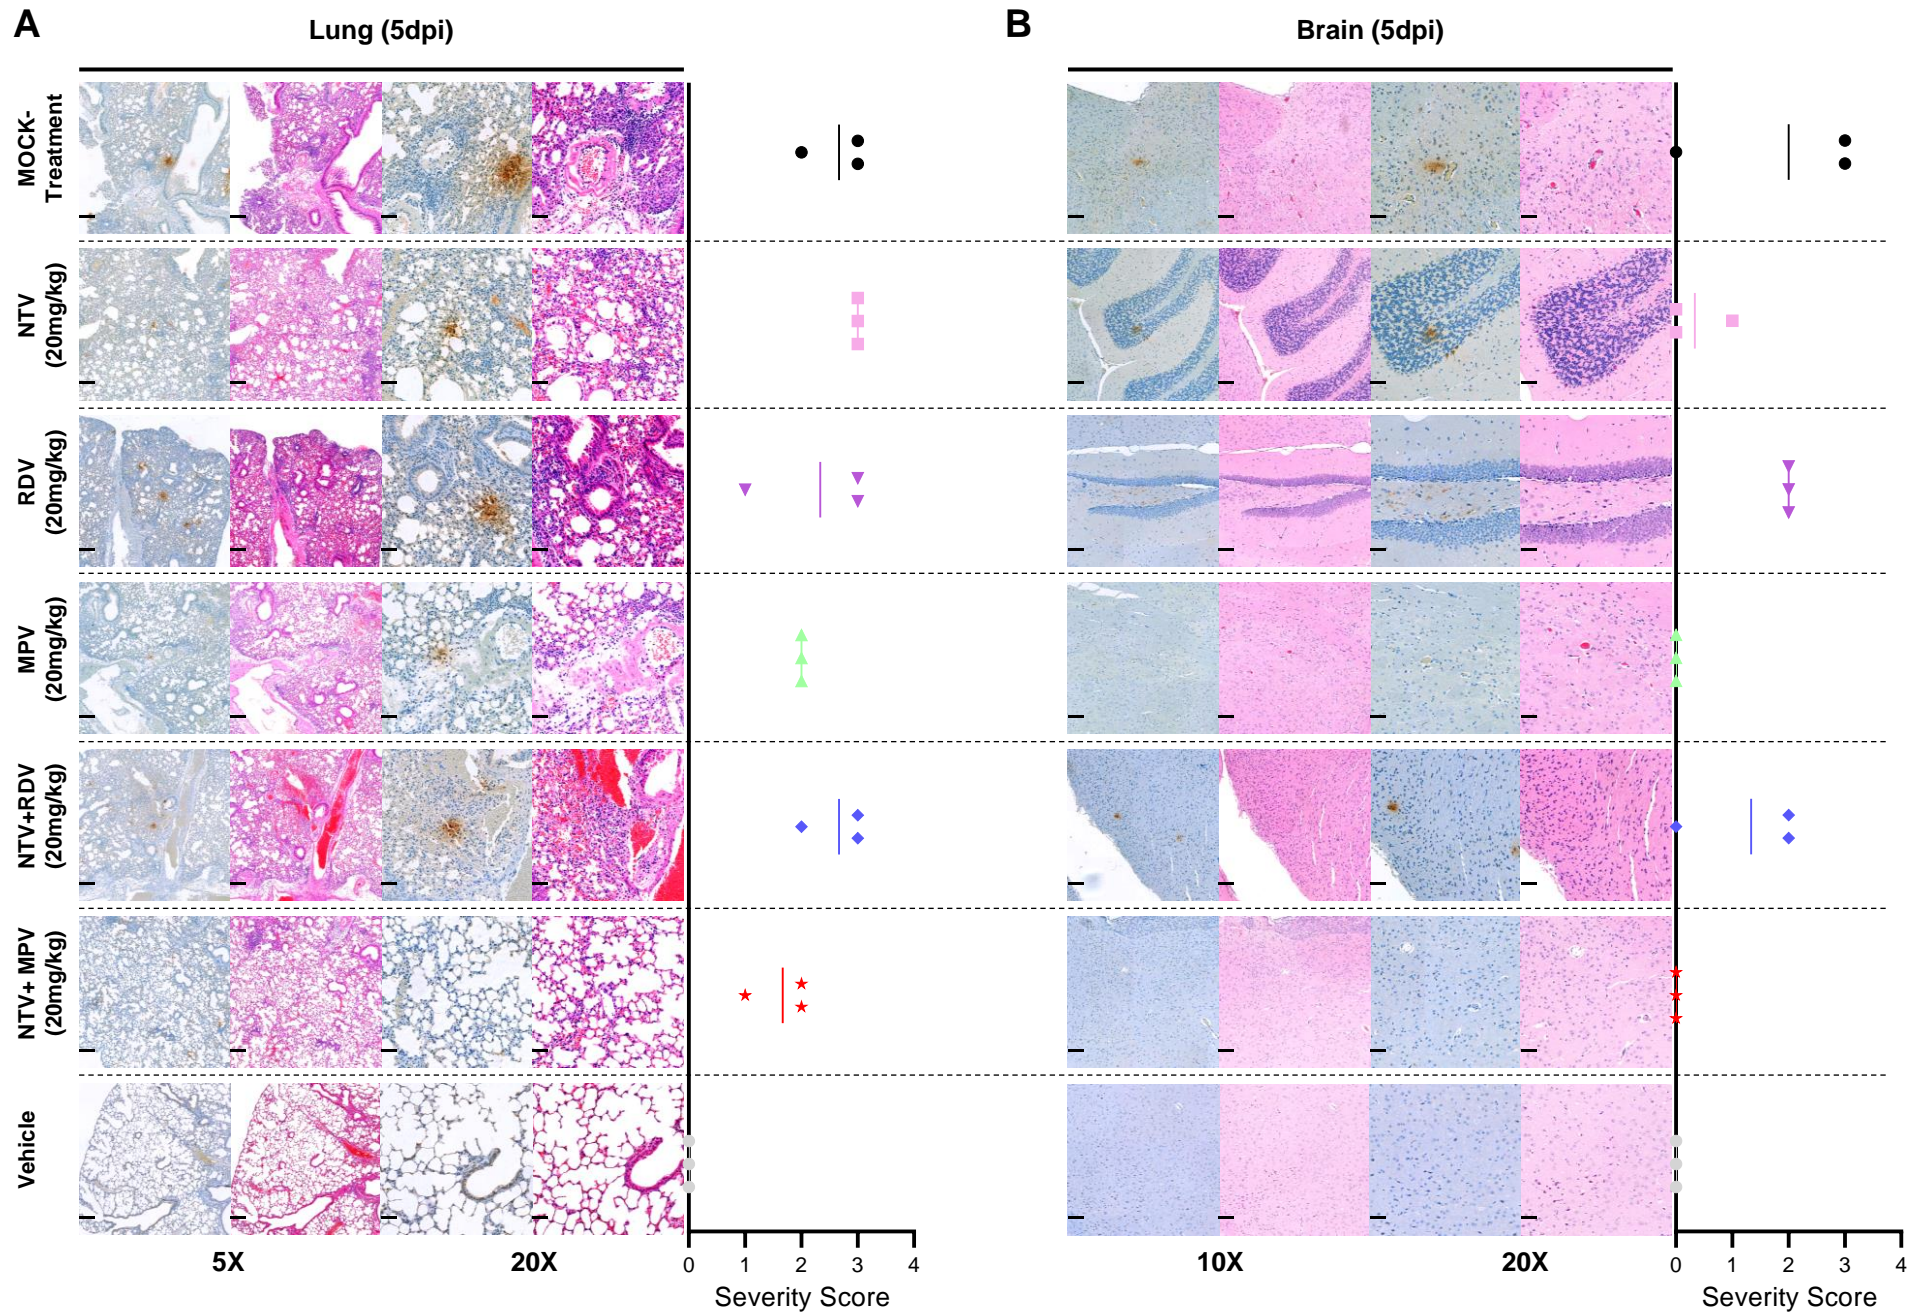

Source: http://biorxiv.org/content/10.1101/2022.06.27.497875v1.full.pdf
